# Supplementary material
Source: publisher site journal article supplement (https://www.dovepress.com/article/607851)
Supplement: Supplementary file 1 [file 607851%20Supplementary%20Material.docx]

**Table S1.** Detailed search strategy for each database (January 2015 to October 2025)

| **Database** | **Keyword and searching stategies** |
| --- | --- |
| **PubMed** | ((((Coronary Disease[MeSH]) AND  (Telerehabilitation[MeSH])) OR ((Coronary Diseases[Title/Abstract]) OR (Disease, Coronary[Title/Abstract]) OR (Coronary Heart Disease[Title/Abstract]) OR (coronary artery disease[Title/Abstract]))) AND ((Telerehabilitations[Title/Abstract]) OR (Virtual Rehabilitation[Title/Abstract]) OR (Tele-rehabilitation[Title/Abstract]) OR (Remote Rehabilitation[Title/Abstract]) OR (home-based rehabilitation[Title/Abstract]))) |
| **Web of Science** | ((TS=(Telerehabilitation)) AND (TS=(Coronary Disease))) OR ((TS=(Coronary Diseases) OR TS=(Coronary Heart Disease) OR TS=(coronary artery disease))) AND ((TS=(Telerehabilitations) OR TS=(Virtual Rehabilitation) OR TS=(Tele-rehabilitation) OR TS=(Remote Rehabilitation) OR TS=(home-based rehabilitation))) |
| **Scopus** | (TITLE-ABS-KEY("coronary disease" OR "coronary heart disease" OR "coronary artery disease")) AND (TITLE-ABS-KEY("remote rehabilitation" OR "home-based rehabilitation" OR "telerehabilitation" OR "hybrid cardiac rehabilitation" OR "cardiac rehabilitation")) |
| **Cochrane Library** | ("coronary disease" OR "coronary heart disease" OR "coronary artery disease") AND ("telerehabilitation" OR "remote rehabilitation" OR "home-based rehabilitation" OR "cardiac rehabilitation") |
| **Google Scholar** | ("coronary heart disease" OR "coronary artery disease") AND ("telerehabilitation" OR "home-based rehabilitation" OR "remote rehabilitation") |
